# Supplementary material for: Preparation and Characterization of Solid Dispersions Composed of Curcumin, Hydroxypropyl Cellulose and/or Sodium Dodecyl Sulfate by Grinding with Vibrational Ball Milling
Source: PubMed Central journal article supplement (PMC7696471; doi:10.3390/ph13110383), 2020-11-12
Supplement: pharmaceuticals-13-00383-s001.pdf [file pharmaceuticals-13-00383-s001.pdf]

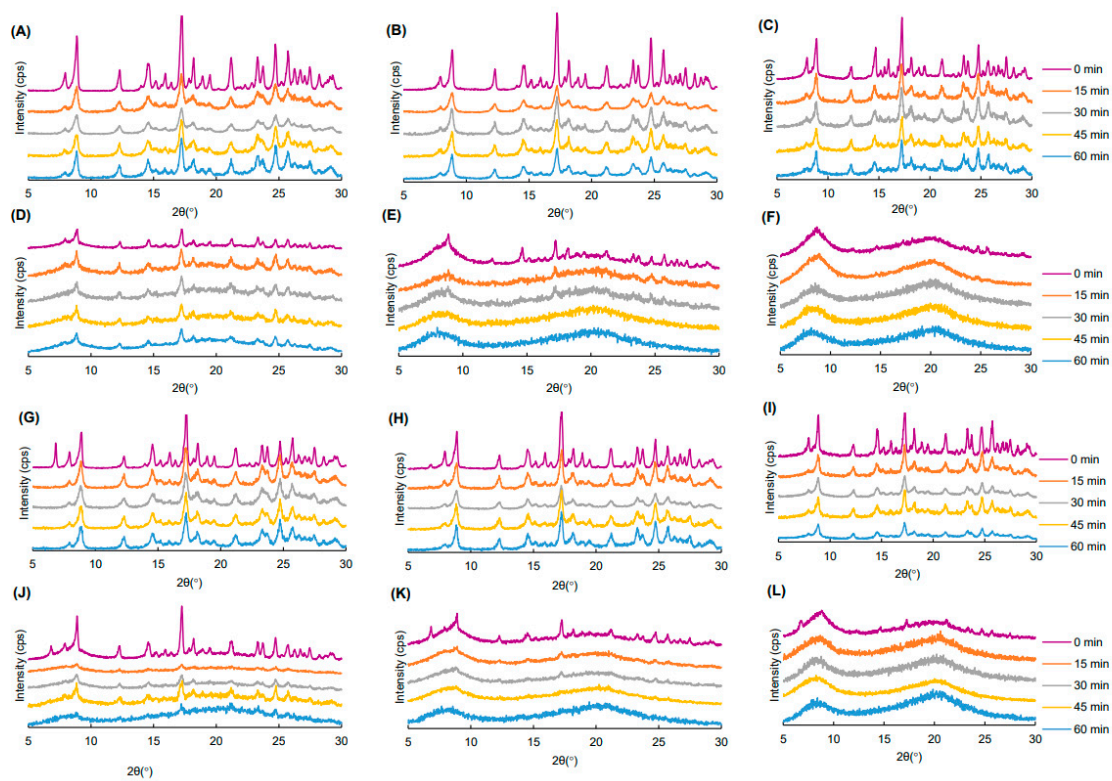

**Figure S1.** PXRD patterns of (A) ground curcumin (CUR) crystals; (B) ground mixtures (GMs) containing CUR and 10% hydroxypropyl cellulose (HPC); (C) GMs containing CUR and 25% HPC, and SDS; (D) GMs containing CUR and 50% HPC; (E) GMs containing CUR and 75% HPC; (F) GMs containing CUR and 90% HPC; (G) GMs containing CUR and sodium dodecyl sulfate (SDS), (H) GMs containing CUR, 10% HPC, and SDS; (I) GMs containing CUR, 25% HPC, and SDS; (J) GMs containing CUR, 50% HPC, and SDS; (K) GMs containing CUR, 75% HPC, and SDS; (L) GMs containing CUR, 90% HPC, and SDS.

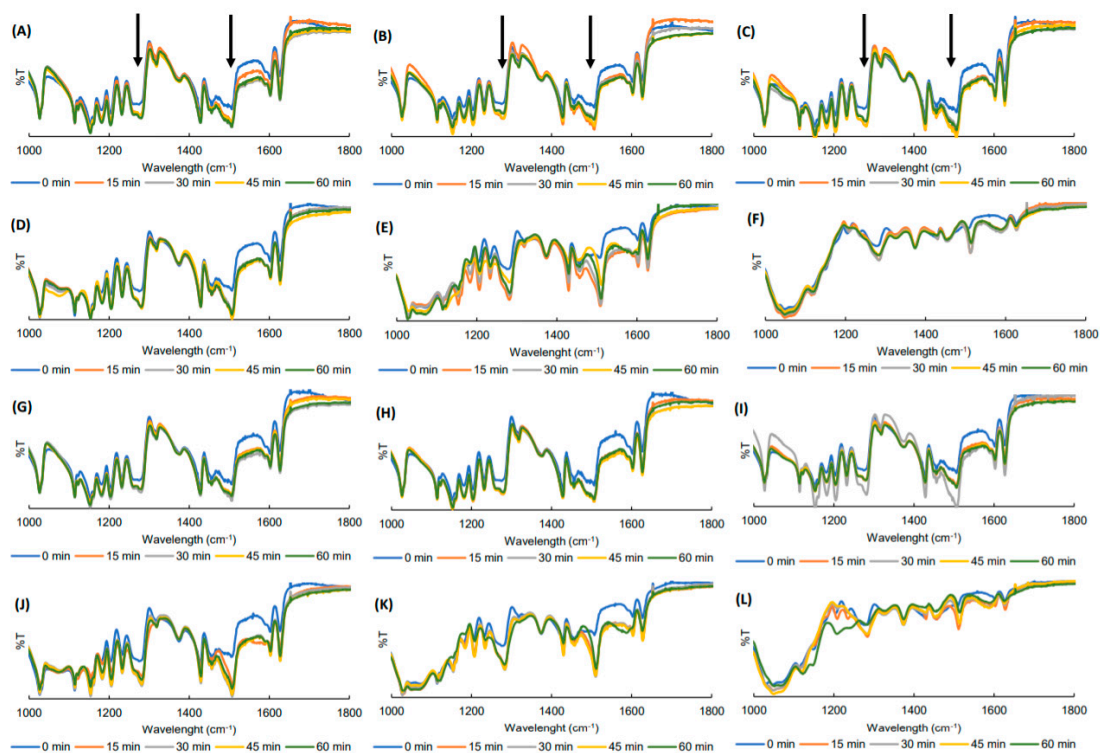

**Figure S2.** FTIR spectra of (A) ground curcumin (CUR) crystals; (B) ground mixtures (GMs) containing CUR and 10% hydroxypropyl cellulose (HPC); (C) GMs containing CUR and 25% HPC, and SDS; (D) GMs containing CUR and 50% HPC; (E) GMs containing CUR and 75% HPC; (F) GMs containing CUR and 90% HPC; (G) GMs containing CUR and sodium dodecyl sulfate (SDS), (H) GMs containing CUR, 10% HPC, and SDS; (I) GMs containing CUR, 25% HPC, and SDS; (J) GMs containing CUR, 50% HPC, and SDS; (K) GMs containing CUR, 75% HPC, and SDS; (L) GMs containing CUR, 90% HPC, and SDS.

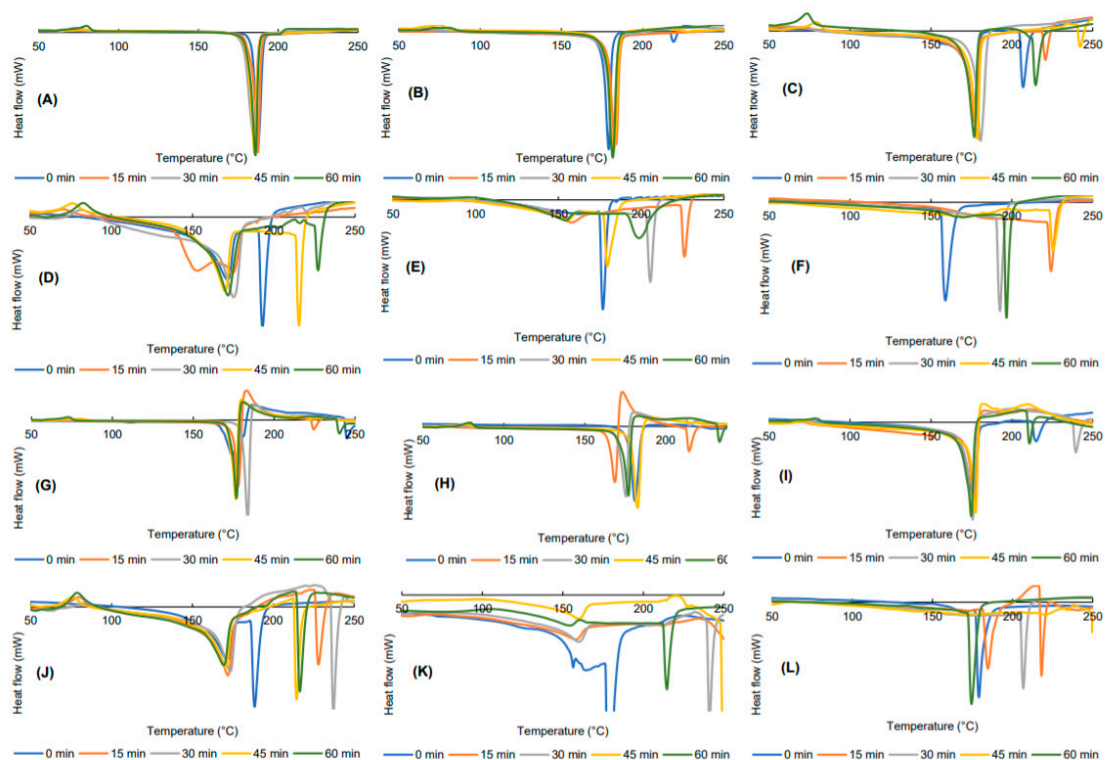

**Figure S3.** DSC curves of (A) ground curcumin (CUR) crystals; (B) ground mixtures (GMs) containing CUR and 10% hydroxypropyl cellulose (HPC); (C) GMs containing CUR and 25% HPC, and SDS; (D) GMs containing CUR and 50% HPC; (E) GMs containing CUR and 75% HPC; (F) GMs containing CUR and 90% HPC; (G) GMs containing CUR and sodium dodecyl sulfate (SDS), (H) GMs containing CUR, 10% HPC, and SDS; (I) GMs containing CUR, 25% HPC, and SDS; (J) GMs containing CUR, 50% HPC, and SDS; (K) GMs containing CUR, 75% HPC, and SDS; (L) GMs containing CUR, 90% HPC, and SDS.

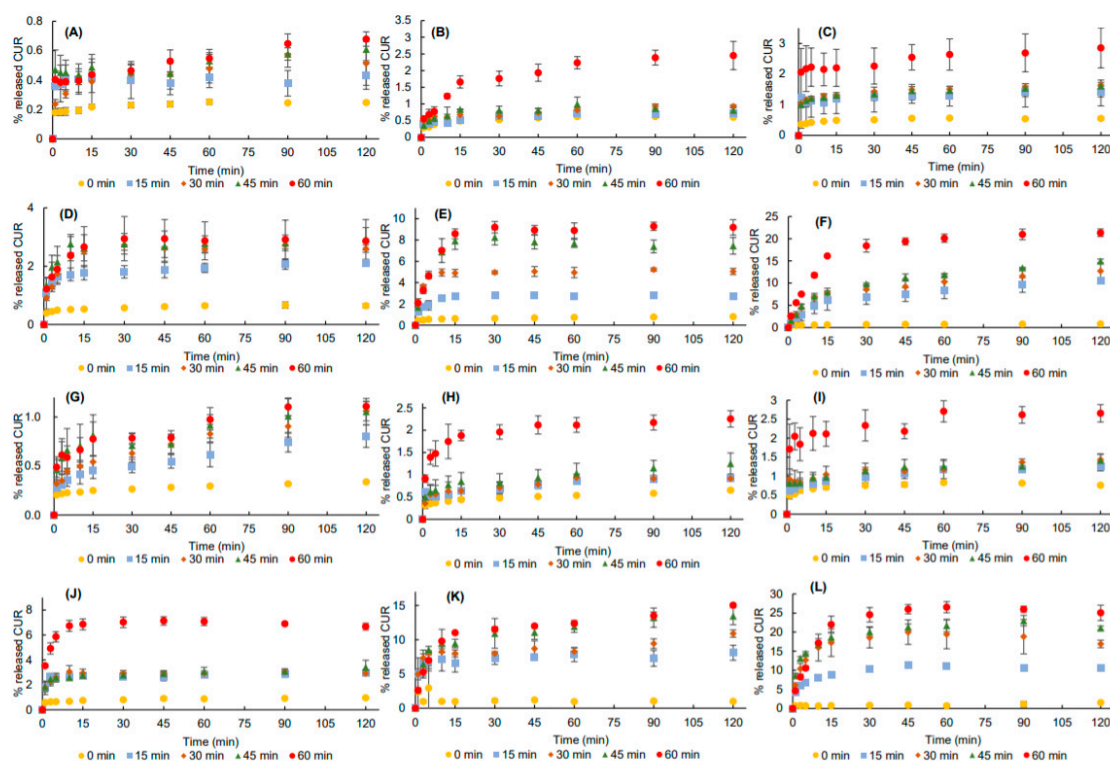

**Figure S4.** Dissolution profiles of (A) ground curcumin (CUR) crystals; (B) ground mixtures (GMs) containing CUR and 10% hydroxypropyl cellulose (HPC); (C) GMs containing CUR and 25% HPC, and SDS; (D) GMs containing CUR and 50% HPC; (E) GMs containing CUR and 75% HPC; (F) GMs containing CUR and 90% HPC; (G) GMs containing CUR and sodium dodecyl sulfate (SDS), (H) GMs containing CUR, 10% HPC, and SDS; (I) GMs containing CUR, 25% HPC, and SDS; (J) GMs containing CUR, 50% HPC, and SDS; (K) GMs containing CUR, 75% HPC, and SDS; (L) GMs containing CUR, 90% HPC, and SDS.

**Table S1.** Inputs and output data of design of experiment

|     | Factor 1 | Factor 2            | Factor 3        | Response |     | Factor 1 | Factor 2            | Factor 3        | Response |
|-----|----------|---------------------|-----------------|----------|-----|----------|---------------------|-----------------|----------|
| Run | HPC (%)  | Grinding time (min) | Presence of SDS | DE (%)   | Run | HPC (%)  | Grinding time (min) | Presence of SDS | DE (%)   |
| 1   | 10       | 30                  | 0               | 0.78     | 31  | 25       | 30                  | 0               | 1.47     |
| 2   | 0        | 15                  | 0               | 0.40     | 32  | 25       | 45                  | 1               | 1.20     |
| 3   | 75       | 60                  | 1               | 12.16    | 33  | 90       | 60                  | 1               | 23.97    |
| 4   | 10       | 15                  | 0               | 2.69     | 34  | 0        | 30                  | 0               | 0.47     |

|    |    |    |   |       |    |    |    |   |       |
|----|----|----|---|-------|----|----|----|---|-------|
| 5  | 50 | 45 | 0 | 2.72  | 35 | 75 | 15 | 0 | 0.64  |
| 6  | 0  | 45 | 0 | 0.52  | 36 | 10 | 60 | 0 | 2.02  |
| 7  | 0  | 60 | 0 | 0.55  | 37 | 50 | 60 | 0 | 2.78  |
| 8  | 90 | 15 | 1 | 10.24 | 38 | 90 | 15 | 0 | 7.92  |
| 9  | 10 | 45 | 1 | 1.00  | 39 | 0  | 45 | 1 | 0.87  |
| 10 | 75 | 45 | 0 | 7.39  | 40 | 10 | 30 | 1 | 0.81  |
| 11 | 90 | 60 | 0 | 18.59 | 41 | 25 | 30 | 1 | 1.20  |
| 12 | 10 | 60 | 1 | 2.04  | 42 | 25 | 60 | 1 | 2.43  |
| 13 | 75 | 60 | 0 | 8.62  | 43 | 50 | 15 | 1 | 2.77  |
| 14 | 25 | 45 | 0 | 1.44  | 44 | 50 | 30 | 1 | 2.90  |
| 15 | 50 | 30 | 0 | 2.55  | 45 | 75 | 15 | 1 | 7.35  |
| 16 | 90 | 45 | 0 | 11.25 | 46 | 75 | 30 | 1 | 8.79  |
| 17 | 75 | 30 | 0 | 4.95  | 47 | 75 | 45 | 1 | 11.54 |
| 18 | 90 | 30 | 0 | 9.76  | 48 | 90 | 45 | 1 | 20.64 |
| 19 | 10 | 45 | 0 | 0.83  | 49 | 0  | 0  | 0 | 0.23  |
| 20 | 50 | 45 | 1 | 2.96  | 50 | 10 | 0  | 0 | 0.53  |
| 21 | 90 | 30 | 1 | 17.99 | 51 | 25 | 0  | 0 | 0.54  |
| 22 | 0  | 15 | 1 | 0.61  | 52 | 50 | 0  | 0 | 0.61  |
| 23 | 25 | 60 | 0 | 2.53  | 53 | 75 | 0  | 0 | 0.69  |
| 24 | 25 | 15 | 0 | 1.31  | 54 | 90 | 0  | 0 | 0.72  |
| 25 | 0  | 30 | 1 | 0.77  | 55 | 0  | 0  | 1 | 0.29  |
| 26 | 0  | 60 | 1 | 0.92  | 56 | 10 | 0  | 1 | 0.53  |
| 27 | 10 | 15 | 1 | 0.79  | 57 | 25 | 0  | 1 | 0.77  |
| 28 | 50 | 15 | 0 | 1.91  | 58 | 50 | 0  | 1 | 0.85  |
| 29 | 25 | 15 | 1 | 1.08  | 59 | 75 | 0  | 1 | 1.10  |
| 30 | 50 | 60 | 1 | 6.80  | 60 | 90 | 0  | 1 | 0.95  |

*HPC, Hydroxypropyl cellulose; SDS, Sodium dodecyl sulfate; DE, Dissolution efficiency*
